# Supplementary material
Source: publisher site journal article supplement (https://www.dovepress.com/article/558108)
Supplement: Supplementary file 1 [file Supplementary%20material.docx]

Supplementary Table

**Table S1.** 124 Overlapping Genes Between Heart Failure and Anxiety

| Numbers | Name of Gene |
| --- | --- |
| 1 | TTN |
| 2 | LMNA |
| 3 | ACE |
| 4 | TBX1 |
| 5 | PTPN11 |
| 6 | IL6 |
| 7 | TERT |
| 8 | CHD7 |
| 9 | CACNA1C |
| 10 | DMD |
| 11 | ELN |
| 12 | TNF |
| 13 | TP53 |
| 14 | GAA |
| 15 | BRAF |
| 16 | GLA |
| 17 | FBN1 |
| 18 | SOS1 |
| 19 | ABCC8 |
| 20 | KRAS |
| 21 | CRP |
| 22 | INS |
| 23 | TGFB1 |
| 24 | POLG |
| 25 | LAMP2 |
| 26 | H19 |
| 27 | FLNA |
| 28 | F2 |
| 29 | ACADVL |
| 30 | HRAS |
| 31 | ALB |
| 32 | CFTR |
| 33 | CBS |
| 34 | APOE |
| 35 | NR5A1 |
| 36 | FMR1 |
| 37 | IL10 |
| 38 | IFNG |
| 39 | ACTB |
| 40 | MAPK1 |
| 41 | RYR1 |
| 42 | MTHFR |
| 43 | CPT2 |
| 44 | LEP |
| 45 | ESR1 |
| 46 | TWNK |
| 47 | SDHA |
| 48 | RERE |
| 49 | IL1B |
| 50 | SLC22A5 |
| 51 | ATM |
| 52 | IGF1 |
| 53 | TP63 |
| 54 | HFE |
| 55 | NF1 |
| 56 | KMT2D |
| 57 | FGFR1 |
| 58 | HADHA |
| 59 | MPV17 |
| 60 | ACADM |
| 61 | POLG2 |
| 62 | PMM2 |
| 63 | MKS1 |
| 64 | SLC17A5 |
| 65 | SOD1 |
| 66 | CEP290 |
| 67 | TSC2 |
| 68 | GLB1 |
| 69 | PIK3CA |
| 70 | HLA-DRB1 |
| 71 | PTEN |
| 72 | SOX9 |
| 73 | SERPINA1 |
| 74 | EP300 |
| 75 | MEF2C |
| 76 | PSEN1 |
| 77 | MMP2 |
| 78 | CP |
| 79 | CTNNB1 |
| 80 | WFS1 |
| 81 | GBA1 |
| 82 | INPP5E |
| 83 | TSC1 |
| 84 | MECP2 |
| 85 | GALT |
| 86 | KCNJ11 |
| 87 | CREBBP |
| 88 | SHH |
| 89 | MTR |
| 90 | NPC1 |
| 91 | MFN2 |
| 92 | COL2A1 |
| 93 | PTCH1 |
| 94 | RRM2B |
| 95 | IDUA |
| 96 | BDNF |
| 97 | NIPBL |
| 98 | AKT1 |
| 99 | GNAS |
| 100 | BRCA2 |
| 101 | NPY |
| 102 | SMPD1 |
| 103 | PEX6 |
| 104 | PGM1 |
| 105 | PGK1 |
| 106 | CTLA4 |
| 107 | ACADS |
| 108 | OPA1 |
| 109 | IDS |
| 110 | TH |
| 111 | NPHP1 |
| 112 | NSD1 |
| 113 | MT-ND1 |
| 114 | ASAH1 |
| 115 | TMEM67 |
| 116 | HSD17B4 |
| 117 | PDHA1 |
| 118 | SLC2A1 |
| 119 | POMC |
| 120 | NR3C1 |
| 121 | ATP7B |
| 122 | DNM1L |
| 123 | COMT |
| 124 | GNPTAB |

**Supplementary Figure**

**
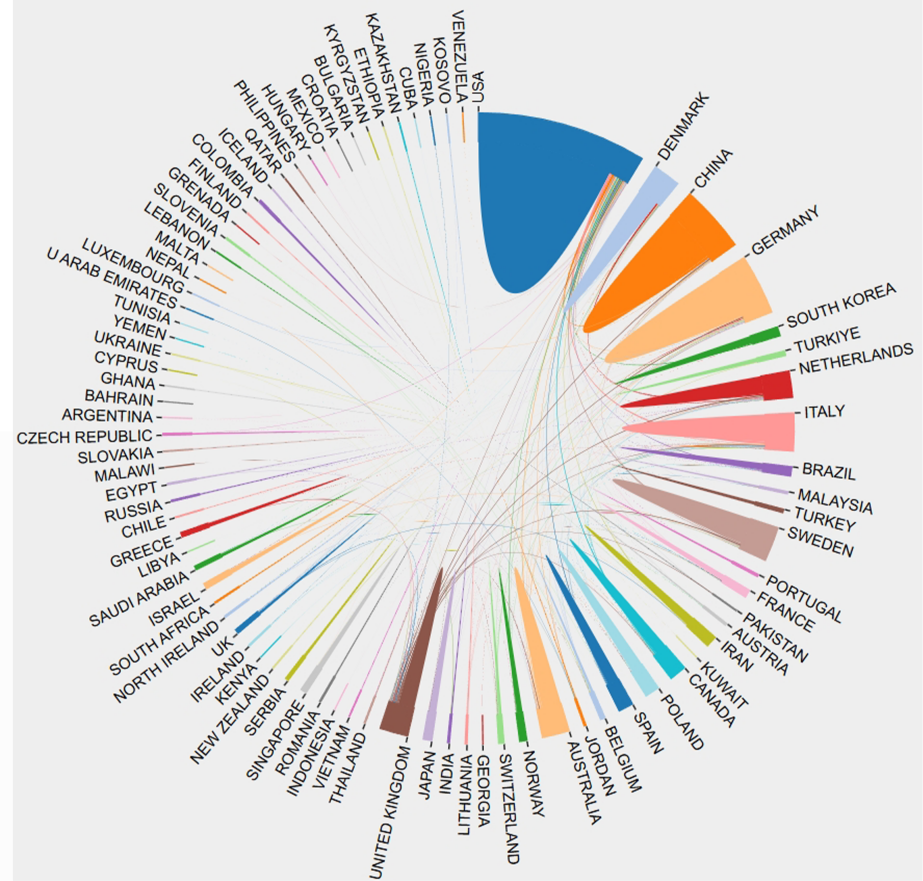
**

**Figure S1.** National Collaboration Network on Heart Failure and Anxiety Comorbidity Published from 2015 to 2024 in Web of science (WoS).
